# Supplementary material for: Pain inhibition through transplantation of fetal neuronal progenitors into the injured spinal cord in rats
Source: PubMed Central journal article supplement — Neural Regen Res. 2019 Nov;14(11):2011–9. doi: 10.4103/1673-5374.259624 (PMC6676883; doi:10.4103/1673-5374.259624), 2019-11
Supplement: NRR-14-2011_Suppl1.pdf [file NRR-14-2011_Suppl1.pdf]

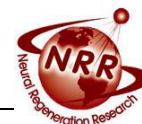**OPEN PEER REVIEW REPORT 1**

**Name of journal:** Neural Regeneration Research

**Manuscript NO:** NRR-D-18-00890

**Title:** Pain inhibition through transplantation of fetal neuronal progenitors into the injured spinal cord in rats

**Reviewer's Name:** Gentian Vyshka

**Reviewer's country:** Albania

**Date sent for review:** 2018-12-21

**Date reviewed:** 2018-12-27

**Review time:** 6 days

**COMMENTS TO AUTHORS**

The paper is very well structured; highly specialized and with a reliable methodology and database.

A few grammatical errors need corrections, such as "from telecenphalic vesicles" (telencephalic);

"hyperexcitability stablished in the dorsal horn" (established).

I suggest using the expression "on the other hand" less frequently; it makes the wording sound awkward.

In some paragraphs repeatedly it is written "data not shown"; but this might confuse the reader. Is there any specific reason for not showing data; would it not be better to avoid this bypasses?

The section of immunofluorescence staining needs some explanation for the unfamiliar reader; at least please quote the author whose methodology you are using or adopting. A number of details, for example, regarding the titer of solutions (1:1000; 1:100, 1:800) might be omitted or otherwise better clarified.

You mention diversity of pharmacological treatments for SCI-related pain, but no word about spinal cord stimulation: for the sake of completeness, please include some comments even on that procedure.
